# Supplementary material for: Isolation and Characterization of Plant Growth-Promoting Endophytic Fungi from the Roots of Dendrobium moniliforme
Source: MDPI journal article supplement (doi:10.3390/plants8010005), 2018-12-28
Supplement: s1 [file s1]

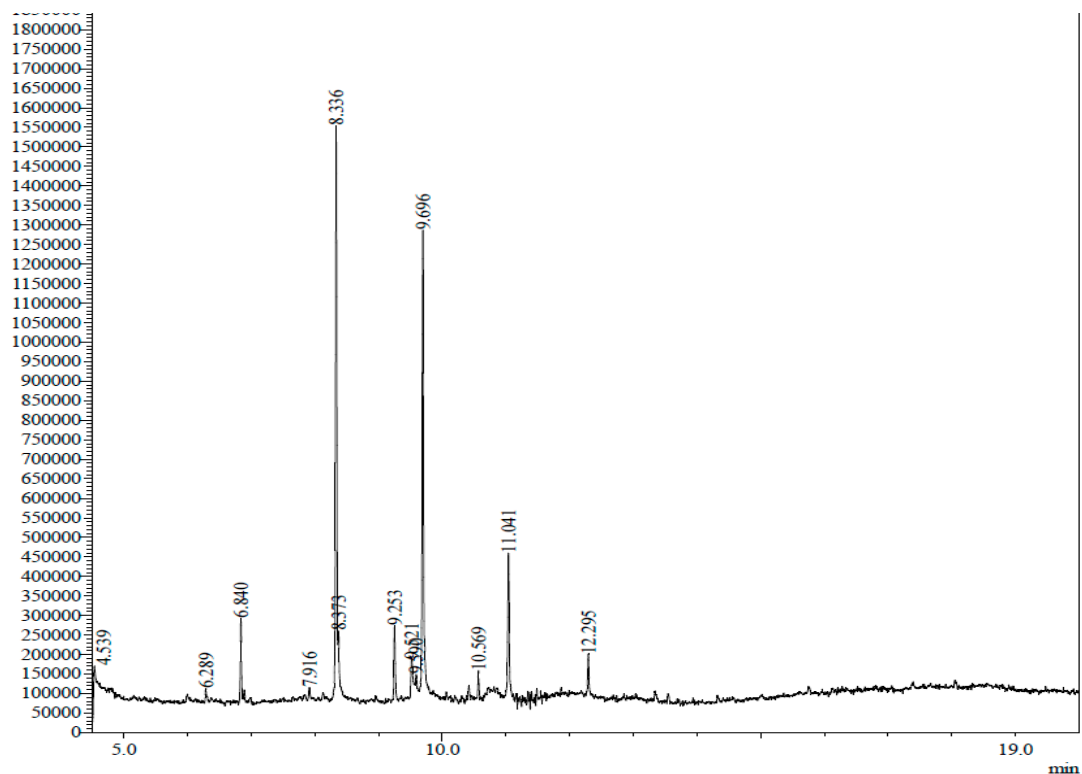

**Figure1.** Gas chromatography-mass spectrometer (GC–MS) analysis of the organic extract of fungus R13 (*Fusarium* sp.) Compounds are identified in the table 2.

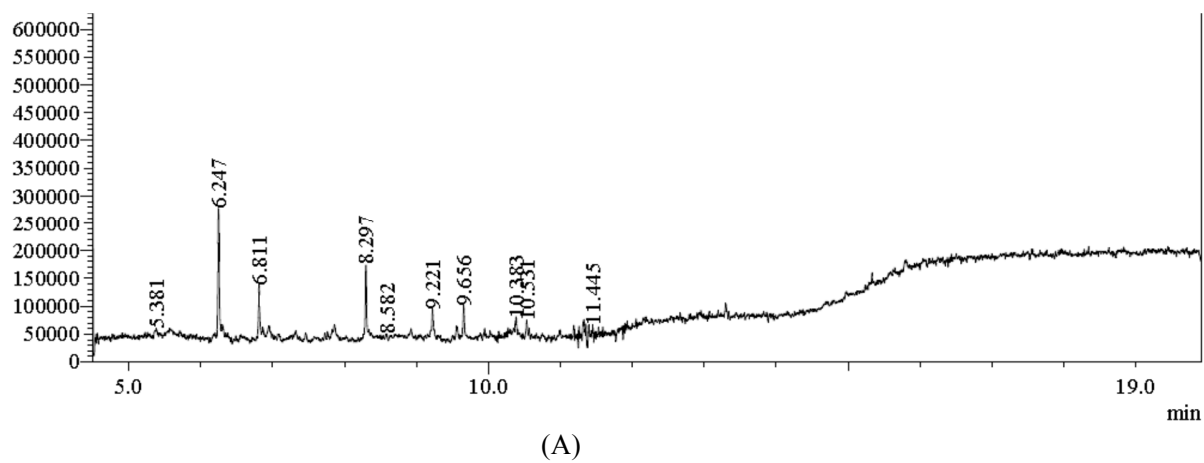

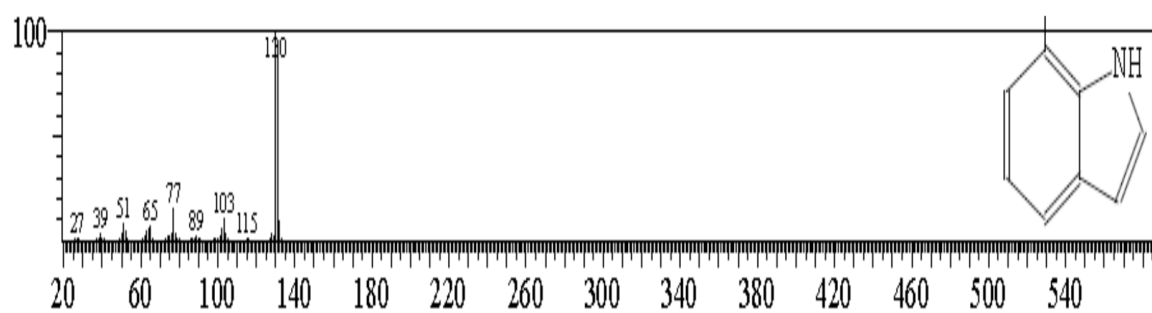

(B)

**Figure 2.** Gas chromatography-mass spectrometer (GC-MS) analysis (chromatograph) of the organic extract of fungus R11 (A) Compounds are identified in the table 2. The presence of IAA compound or its derivative in trace amount (B).
